# Supplementary material for: Biomarkers Associated with Lymph Nodal Metastasis in Endometrioid Endometrial Carcinoma
Source: MDPI journal article supplement (doi:10.3390/cancers14092188), 2022-04-27
Supplement: s1 [file s1]

Supplementary data

**Table S1.** Detailed histological and molecular characteristics of patients with EEC treated at Institut Bergonie selected after matching and quality control (N=28), France, 2010–2017.

| ID | N status | Grade | Myometrial invasion | LVI             | Stromal reaction | MELF pattern | Inflammatory inflammation | Peri nervous invasion | <i>POLE</i> pathogenic mutation | p53 IHC   | <i>TP53</i> mutation             | <i>TP53</i> mutation's pathogenicity | MMR status (IHC) | Molecular classification group | CTNNB1 mutation                | CTNNB1 mutation's pathogenicity |
|----|----------|-------|---------------------|-----------------|------------------|--------------|---------------------------|-----------------------|---------------------------------|-----------|----------------------------------|--------------------------------------|------------------|--------------------------------|--------------------------------|---------------------------------|
| 1  | N+       | 2     | > 50%               | Substantial     | Presence         | Absence      | Absence                   | Presence              | Absence                         | wild type | exon3:c.98C>G                    | Non-pathogenic                       | Proficient       | NSMP                           |                                |                                 |
| 2  | N+       | 2     | > 50%               | Substantial     | Presence         | Presence     | Absence                   | Absence               | Absence                         | wild type |                                  |                                      | Proficient       | NSMP                           |                                |                                 |
| 3  | N+       | 3     | > 50%               | Substantial     | Absence          | Absence      | Presence                  | Absence               | Absence                         |           |                                  |                                      | Deficient        | Hypermutated (MSI)             |                                |                                 |
| 4  | N+       | 2     | > 50%               | Absent          | Absence          | Absence      | Absence                   | Absence               | Absence                         |           |                                  |                                      | Deficient        | Hypermutated (MSI)             |                                |                                 |
| 5  | N+       | 1     | ≤ 50%               | Substantial     | Presence         | Presence     | Absence                   | Presence              | Absence                         | wild type | exon5:c.522A>G;<br>exon3:c.98C>G | Non-pathogenic                       | Deficient        | Hypermutated (MSI)             |                                |                                 |
| 6  | N+       | 3     | > 50%               | Substantial     | Presence         | Presence     | Absence                   | Absence               | Absence                         | wild type | exon3:c.98C>G                    | Non-pathogenic                       | Deficient        | Hypermutated (MSI)             |                                |                                 |
| 7  | N+       | 2     | ≤ 50%               | Absent          | Absence          | Absence      | Absence                   | Absence               | Absence                         | wild type | exon5:c.522A>G<br>exon3:c.98C>G  | Non-pathogenic                       | Proficient       | NSMP                           | exon3:c.98C>A<br>exon3:c.98C>T | Pathogenic                      |
| 8  | N+       | 2     | > 50%               | Substantial     | Presence         | Presence     | Presence                  | Absence               | Absence                         | wild type |                                  |                                      | Deficient        | Hypermutated (MSI)             |                                |                                 |
| 10 | N+       | 2     | ≤ 50%               | Non-substantial | Presence         | Presence     | Absence                   | Absence               | Absence                         | wild type | exon3:c.98C>G                    | Non-pathogenic                       | Proficient       | NSMP                           |                                |                                 |
| 11 | N+       | 2     | > 50%               | Non-substantial | Absence          | Absence      | Absence                   | Absence               | Absence                         | wild type |                                  |                                      | Deficient        | Hypermutated (MSI)             |                                |                                 |
| 12 | N+       | 3     | > 50%               | Non-substantial | Presence         | Presence     | Presence                  | Presence              | Absence                         | Abnormal  | exon6:c.655G>A                   | Pathogenic                           | Proficient       | Serous like (TP53 mutation)    |                                |                                 |
| 13 | N+       | 3     | > 50%               | Substantial     | Presence         | Absence      | Absence                   | Presence              | Absence                         | wild type | exon3:c.98C>G                    | Non-pathogenic                       | Deficient        | Hypermutated (MSI)             |                                |                                 |
| 14 | N+       | 2     | ≤ 50%               | Substantial     | Presence         | Presence     | Presence                  | Absence               | Absence                         | wild type |                                  |                                      | Deficient        | Hypermutated (MSI)             |                                |                                 |
| 15 | N+       | 2     | > 50%               | Substantial     | Presence         | Presence     | Absence                   | Absence               | Absence                         | wild type | exon7:c.700C>T                   | Pathogenic                           | Proficient       | Serous like (TP53 mutation)    | exon3:c.110C>T                 | Pathogenic                      |
| 16 | N+       | 3     | ≤ 50%               | Non-substantial | Presence         | Presence     | Presence                  | Absence               | Absence                         | wild type | exon3:c.98C>G                    | Non-pathogenic                       | Deficient        | Hypermutated (MSI)             |                                |                                 |
| 17 | N+       | 2     | ≤ 50%               | Absent          | Presence         | Presence     | Presence                  | Absence               | Absence                         | Abnormal  | exon6:c.655G>A                   | Pathogenic                           | Proficient       | Serous like (TP53 mutation)    |                                |                                 |

| ID | N status | Grade | Myometrial invasion | LVI             | Stromal reaction | MELF pattern | Inflammatory inflammation | Peri nervous invasion | POLE pathogenic mutation | p53 IHC   | TP53 mutation                   | TP53 mutation's pathogenicity | MMR status (IHC) | Molecular classification group | CTNNB1 mutation                | CTNNB1 mutation's pathogenicity |
|----|----------|-------|---------------------|-----------------|------------------|--------------|---------------------------|-----------------------|--------------------------|-----------|---------------------------------|-------------------------------|------------------|--------------------------------|--------------------------------|---------------------------------|
| 32 | N-       | 3     | ≤ 50%               | Absent          | Absence          | Absence      | Absence                   | Absence               | Absence                  | wild type |                                 |                               | Proficient       | NSMP                           |                                |                                 |
| 33 | N-       | 2     | ≤ 50%               | Non-substantial | Presence         | Presence     | Presence                  | Absence               | Absence                  | wild type | exon3:c.98C>G                   | Non-pathogenic                | Proficient       | NSMP                           |                                |                                 |
| 39 | N-       | 2     | > 50%               | Absent          | Presence         | Absence      | Absence                   | Absence               | Absence                  | wild type |                                 |                               | Proficient       | NSMP                           | exon3:c.110C>T                 | Pathogenic                      |
| 40 | N-       | 2     | > 50%               | Absent          | Absence          | Absence      | Absence                   | Absence               | Absence                  | wild type | exon5:c.522A>G<br>exon3:c.98C>G | Non-pathogenic                | Deficient        | Hypermutated (MSI)             |                                |                                 |
| 46 | N-       | 2     | > 50%               | Absent          | Absence          | Absence      | Presence                  | Absence               | Absence                  | wild type |                                 |                               | Deficient        | Hypermutated (MSI)             |                                |                                 |
| 49 | N-       | 3     | > 50%               | Substantial     | Presence         | Presence     | Presence                  | Absence               | Absence                  | wild type |                                 |                               | Deficient        | Hypermutated (MSI)             |                                |                                 |
| 50 | N-       | 2     | > 50%               | Absent          | Absence          | Absence      | Absence                   | Absence               | Absence                  | wild type |                                 |                               | Proficient       | NSMP                           | exon3:c.134C>T                 | Pathogenic                      |
| 51 | N-       | 2     | > 50%               | Absent          | Presence         | Presence     | Presence                  | Presence              | Absence                  | wild type | exon5:c.522A>G                  | Non-pathogenic                | Proficient       | NSMP                           | exon3:c.98C>A<br>exon3:c.98C>T | Pathogenic                      |
| 53 | N-       | 1     | ≤ 50%               | Absent          | Absence          | Absence      | Absence                   | Absence               | Absence                  | wild type |                                 |                               | Proficient       | NSMP                           | exon3:c.98C>A<br>exon3:c.98C>T | Pathogenic                      |
| 56 | N-       | 3     | > 50%               | Substantial     | Presence         | Absence      | Presence                  | Absence               | Absence                  | wild type |                                 |                               | Deficient        | Hypermutated (MSI)             |                                |                                 |
| 59 | N-       | 2     | > 50%               | Absent          | Absence          | Absence      | Absence                   | Absence               | Absence                  | wild type | exon3:c.98C>G                   | Non-pathogenic                | Proficient       | NSMP                           | exon3:c.110C>T                 | Pathogenic                      |

**Table S2.** Comparison of histopathological characteristics and molecular patterns of cluster A (*n* =8), cluster B (*n* =10) and cluster C (*n* =11) defined in unsupervised analysis, Institut Bergonie, 2010–2017.

| Pathological characteristics                                  |                                | Cluster A<br>( <i>n</i> =7) |           | Cluster B<br>( <i>n</i> =10) |             | Cluster C<br>( <i>n</i> =11) |           | <i>p</i> -value <sup>1</sup> |
|---------------------------------------------------------------|--------------------------------|-----------------------------|-----------|------------------------------|-------------|------------------------------|-----------|------------------------------|
|                                                               |                                | <i>n</i> (%)                | Mean (SD) | <i>n</i> (%)                 | Mean (SD)   | <i>n</i> (%)                 | Mean (SD) |                              |
| <b>Lymph node involvement</b>                                 |                                |                             |           |                              |             |                              |           | 0.007                        |
|                                                               | N0                             | 0 (0.0)                     |           | 4 (40.0)                     |             | 8 (72.7)                     |           |                              |
|                                                               | N1                             | 7 (100.0)                   |           | 6 (60.0)                     |             | 3 (27.3)                     |           |                              |
| <b>Histological grade</b>                                     |                                |                             |           |                              |             |                              |           | 0.14                         |
|                                                               | Low grade (grade 1 & grade 2)  | 2 (28.6)                    |           | 5 (50.0)                     |             | 1 (9.1)                      |           |                              |
|                                                               | High grade (grade 3)           | 5 (71.4)                    |           | 5 (50.0)                     |             | 10 (90.9)                    |           |                              |
| <b>Myometrial invasion</b>                                    |                                |                             |           |                              |             |                              |           | 0.9                          |
|                                                               | <= 50%                         | 3 (42.9)                    |           | 3 (30.0)                     |             | 4 (36.4)                     |           |                              |
|                                                               | > 50%                          | 4 (57.1)                    |           | 7 (70.0)                     |             | 7 (63.6)                     |           |                              |
| <b>Angioinvasion</b>                                          |                                |                             |           |                              |             |                              |           | 0.05                         |
|                                                               | Presence                       | 5 (74.4)                    |           | 8 (80.0)                     |             | 3 (27.3)                     |           |                              |
|                                                               | Absence                        | 2 (28.6)                    |           | 2 (20.0)                     |             | 8 (72.7)                     |           |                              |
| <b>Number of angioinvasion (if presence of angioinvasion)</b> |                                |                             | 4.4 (4.0) |                              | 11.7 (12.3) |                              | 1.4 (2.8) |                              |
| <b>Stromal Reaction</b>                                       |                                |                             |           |                              |             |                              |           | 0.12                         |
|                                                               | Presence                       | 5 (71.4)                    |           | 8 (80.0)                     |             | 4 (36.4)                     |           |                              |
|                                                               | Absence                        | 2 (28.6)                    |           | 2 (20.0)                     |             | 7 (63.6)                     |           |                              |
| <b>MELF pattern</b>                                           |                                |                             |           |                              |             |                              |           | 0.3                          |
|                                                               | Presence                       | 4 (57.1)                    |           | 6 (60.0)                     |             | 3 (27.3)                     |           |                              |
|                                                               | Absence                        | 3 (42.9)                    |           | 4 (40.0)                     |             | 8 (72.7)                     |           |                              |
| <b>Inflammatory infiltration</b>                              |                                |                             |           |                              |             |                              |           | 0.6                          |
|                                                               | Presence                       | 3 (42.9)                    |           | 5 (50.0)                     |             | 3 (27.3)                     |           |                              |
|                                                               | Absence                        | 4 (57.1)                    |           | 5 (50.0)                     |             | 8 (72.7)                     |           |                              |
| <b>Peri nervous invasion</b>                                  |                                |                             |           |                              |             |                              |           | 0.8                          |
|                                                               | Presence                       | 2 (28.6)                    |           | 1 (10.0)                     |             | 2 (18.2)                     |           |                              |
|                                                               | Absence                        | 5 (71.4)                    |           | 9 (90.0)                     |             | 9 (81.8)                     |           |                              |
| <b>Molecular classification (TCGA)</b>                        |                                |                             |           |                              |             |                              |           |                              |
|                                                               | Ultramutated                   |                             |           |                              |             |                              |           |                              |
|                                                               | Hypermutated                   |                             |           |                              |             |                              |           |                              |
|                                                               | Serous like                    |                             |           |                              |             |                              |           |                              |
|                                                               | Non specific molecular profile |                             |           |                              |             |                              |           |                              |

**Table S3** Comparison of histopathological characteristics and molecular patterns of EEC from cluster C without lymph node involvement ( $n=8$ ) and with lymph node involvement ( $n=3$ ), Institut Bergonie, 2010–2017.

| Pathological characteristics                 | EEC with negative lymph nodes<br>( $n=8$ ) |           | EEC with positive lymph nodes ( $n=3$ ) |           |
|----------------------------------------------|--------------------------------------------|-----------|-----------------------------------------|-----------|
|                                              | $n$ (%)                                    | Mean (SD) | $n$ (%)                                 | Mean (SD) |
| <b>Histological grade</b>                    |                                            |           |                                         |           |
| Low grade (grade 1 & grade 2)                | 7 (87.5)                                   |           | 3 (100.0)                               |           |
| High grade (grade 3)                         | 1 (12.5)                                   |           | 0 (0.0)                                 |           |
| <b>Myometrial invasion</b>                   |                                            |           |                                         |           |
| $\leq 50\%$                                  | 2 (25.0)                                   |           | 2 (66.7)                                |           |
| $> 50\%$                                     | 6 (75.0)                                   |           | 1 (33.3)                                |           |
| <b>Angioinvasion</b>                         |                                            |           |                                         |           |
| Absence                                      | 8 (100.0)                                  |           | 0 (0.0)                                 |           |
| Non-substantial                              | 0 (0.0)                                    |           | 1 (33.3)                                |           |
| Substantial                                  | 0 (0.0)                                    |           | 2 (66.7)                                |           |
| <b>Stromal Reaction</b>                      |                                            |           |                                         |           |
| Presence                                     | 2 (25.0)                                   |           | 2 (66.7)                                |           |
| Absence                                      | 6 (75.0)                                   |           | 1 (33.3)                                |           |
| <b>MELF pattern</b>                          |                                            |           |                                         |           |
| Presence                                     | 7 (87.5)                                   |           | 1 (33.3)                                |           |
| Absence                                      | 1 (12.5)                                   |           | 2 (66.7)                                |           |
| <b>Inflammatory infiltration</b>             |                                            |           |                                         |           |
| Presence                                     | 2 (25.0)                                   |           | 1 (33.3)                                |           |
| Absence                                      | 6 (75.0)                                   |           | 2 (66.7)                                |           |
| <b>Peri nervous invasion</b>                 |                                            |           |                                         |           |
| Presence                                     | 1 (12.5)                                   |           | 1 (33.3)                                |           |
| Absence                                      | 7 (87.5)                                   |           | 2 (66.7)                                |           |
| <b>Molecular classification group (TCGA)</b> |                                            |           |                                         |           |
| Ultramutated ( <i>POLE</i> mutation)         | 0 (0.0)                                    |           | 0 (0.0)                                 |           |
| Hypermutated (MSI)                           | 2 (25.0)                                   |           | 3 (100.0)                               |           |
| Serous like ( <i>TP53</i> mutation)          | 0 (0.0)                                    |           | 0 (0.0)                                 |           |
| Non specific molecular profile               | 6 (75.0)                                   |           | 0 (0.0)                                 |           |

**Table S4.** Fifty-four genes signature to discriminate -N+ and N- patients, Institut Bergonie, 2010–2017.

| SYMBOL          | DESCRIPTION                                                              |
|-----------------|--------------------------------------------------------------------------|
| <i>ABCC9</i>    | ATP-binding cassette, sub-family C (CFTR/MRP), member 9                  |
| <i>ACTA2</i>    | actin, alpha 2, smooth muscle, aorta                                     |
| <i>ACTG2</i>    | actin, gamma 2, smooth muscle, enteric                                   |
| <i>ALDH1A2</i>  | aldehyde dehydrogenase 1 family, member A2                               |
| <i>ARSI</i>     | arylsulfatase family, member I                                           |
| <i>ASPN</i>     | asporin                                                                  |
| <i>BCHE</i>     | butyrylcholinesterase                                                    |
| <i>BNC2</i>     | basonuclin 2                                                             |
| <i>C9ORF171</i> | chromosome 9 open reading frame 171                                      |
| <i>CACNB2</i>   | calcium channel, voltage-dependent, beta 2 subunit                       |
| <i>CCDC65</i>   | coiled-coil domain containing 65                                         |
| <i>CHRD12</i>   | chordin-like 2                                                           |
| <i>CNN1</i>     | calponin 1, basic, smooth muscle                                         |
| <i>DDR2</i>     | discoidin domain receptor tyrosine kinase 2                              |
| <i>DES</i>      | desmin                                                                   |
| <i>DPP6</i>     | dipeptidyl-peptidase 6                                                   |
| <i>EFEMP1</i>   | EGF containing fibulin-like extracellular matrix protein 1               |
| <i>EXTL1</i>    | exostosin-like glycosyltransferase 1                                     |
| <i>FLNC</i>     | filamin C, gamma                                                         |
| <i>FNDC5</i>    | fibronectin type III domain containing 5                                 |
| <i>GAS2L2</i>   | growth arrest-specific 2 like 2                                          |
| <i>GUCY2F</i>   | guanylate cyclase 2F, retinal                                            |
| <i>HABP2</i>    | hyaluronan binding protein 2                                             |
| <i>HSPB6</i>    | heat shock protein, alpha-crystallin-related, B6                         |
| <i>JPH2</i>     | junctophilin 2                                                           |
| <i>KCNAB1</i>   | potassium voltage-gated channel, shaker-related subfamily, beta member 1 |
| <i>KIF5A</i>    | kinesin family member 5A                                                 |
| <i>LMOD1</i>    | leiomodulin 1 (smooth muscle)                                            |
| <i>MEP1A</i>    | meprin A, alpha (PABA peptide hydrolase)                                 |
| <i>MGP</i>      | matrix Gla protein                                                       |
| <i>MRGPRF</i>   | MAS-related GPR, member F                                                |
| <i>MUM1L1</i>   | melanoma associated antigen (mutated) 1-like 1                           |
| <i>MYH11</i>    | myosin, heavy chain 11, smooth muscle                                    |
| <i>MYOCD</i>    | myocardinmyocardin                                                       |
| <i>NAALAD2</i>  | N-acetylated alpha-linked acidic dipeptidase 2                           |
| <i>PAGE4</i>    | P antigen family, member 4 (prostate associated)                         |
| <i>PDLIM3</i>   | PDZ and LIM domain 3                                                     |
| <i>PRSS46</i>   | protease, serine, 46                                                     |
| <i>PRSS50</i>   | protease, serine, 50                                                     |
| <i>PTGFR</i>    | prostaglandin F receptor (FP)                                            |
| <i>RERG</i>     | RAS-like, estrogen-regulated, growth inhibitor                           |
| <i>ROPN1L</i>   | rhophilin associated tail protein 1-like                                 |
| <i>RSPO1</i>    | R-spondin 1                                                              |
| <i>RSPO3</i>    | R-spondin 3                                                              |

|                |                                                                 |
|----------------|-----------------------------------------------------------------|
| <i>SGCA</i>    | sarcoglycan, alpha (50kDa dystrophin-associated glycoprotein)   |
| <i>SLC22A3</i> | solute carrier family 22 (organic cation transporter), member 3 |
| <i>SPARCL1</i> | SPARC-like 1 (hevin)                                            |
| <i>SSC5D</i>   | scavenger receptor cysteine rich domain containing (5 domains)  |
| <i>TAGLN</i>   | transgelin                                                      |
| <i>TCEAL5</i>  | transcription elongation factor A (SII)-like 5                  |
| <i>TNXB</i>    | tenascin XB                                                     |
| <i>TRIM55</i>  | tripartite motif containing 55                                  |
| <i>UNC5C</i>   | unc-5 homolog C (C. elegans)                                    |
| <i>WT1</i>     | Wilms tumor 1                                                   |

**Table S5.** Confusion matrix of cross validated 54 genes.

|                 |            | <i>EXPECTED</i> |           |            |
|-----------------|------------|-----------------|-----------|------------|
| <i>OBSERVED</i> |            | <i>N+</i>       | <i>N-</i> | <i>TOT</i> |
|                 | <i>N+</i>  | 6               | 1         | 7          |
|                 | <i>N-</i>  | 1               | 7         | 8          |
|                 | <i>TOT</i> | 7               | 8         | 15         |

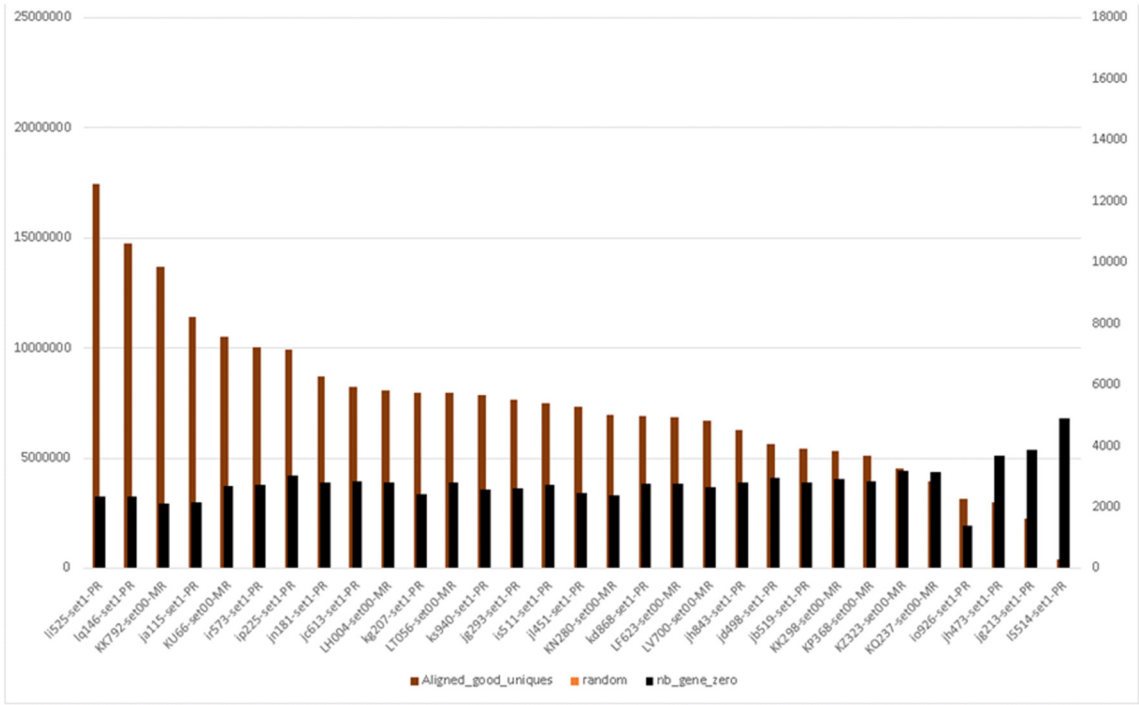

**Figure S1.** Quality control proportion on gene to zero according to coverage.

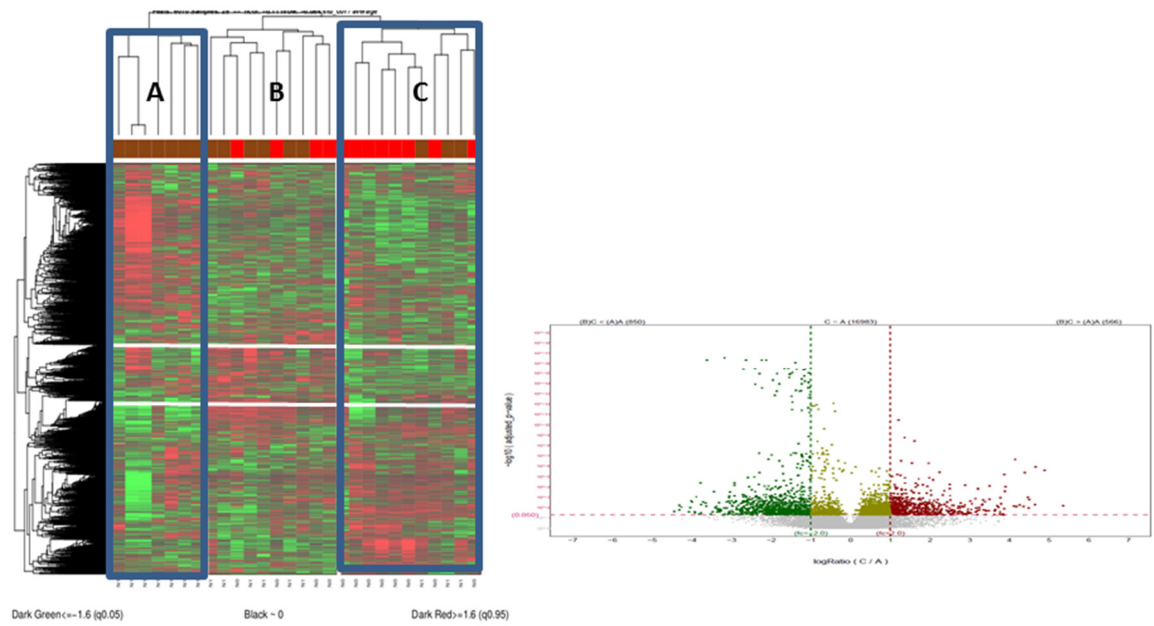

**Figure S2.** Differential gene expression on cluster A and C found 1416 genes, Institut Bergonie, 2010–2017.

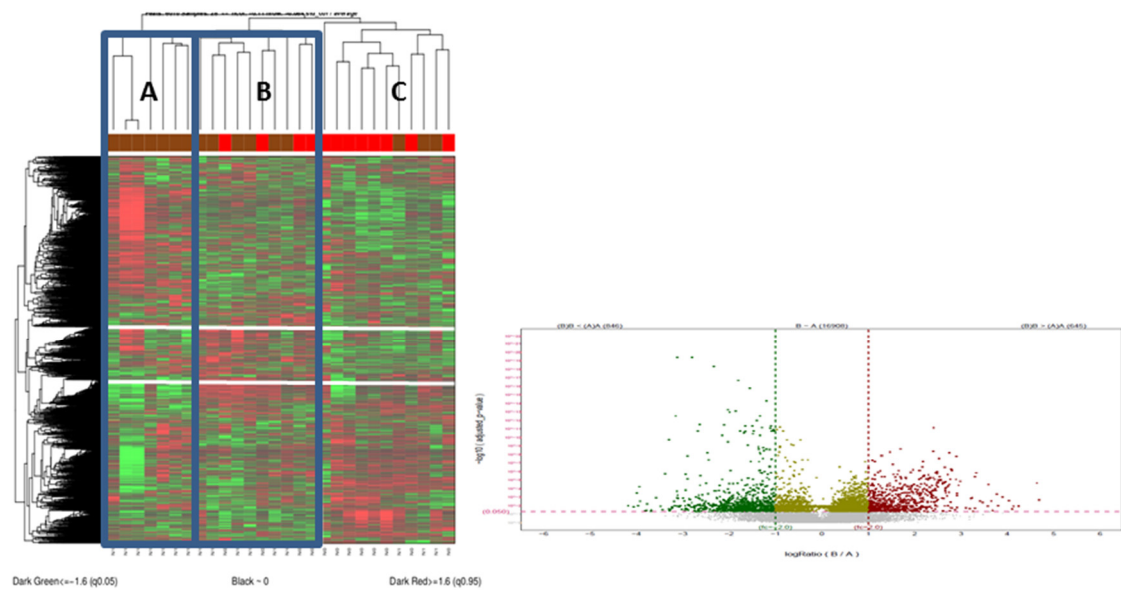

**Figure S3.** Differential gene expression of cluster A and B found 1491 genes, Institut Bergonie, 2010–2017.

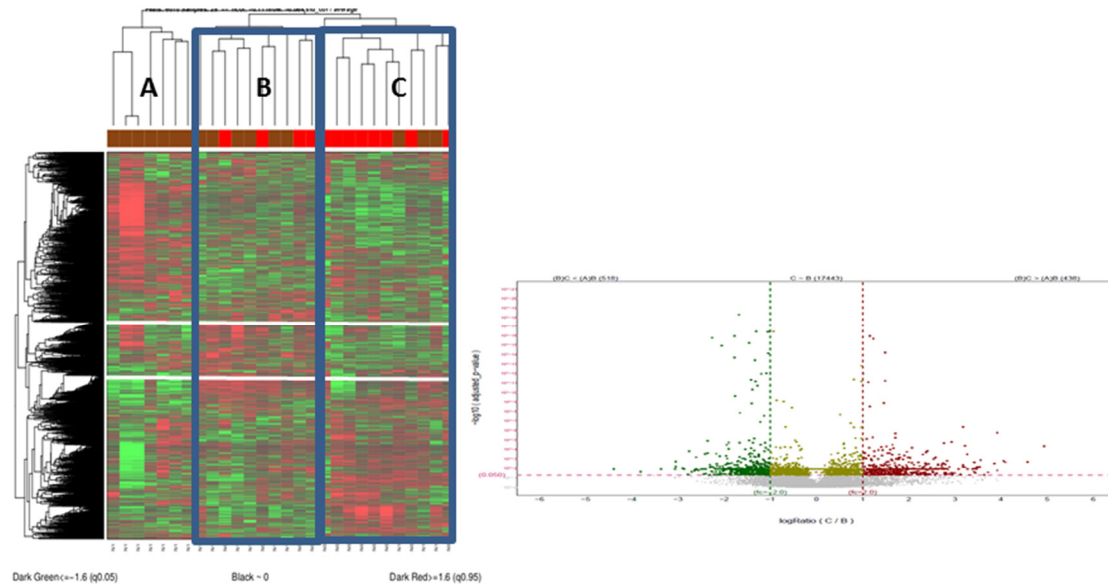

**Figure S4.** Differential gene expression of cluster B and C found 956 genes, Institut Bergonie, 2010–2017.

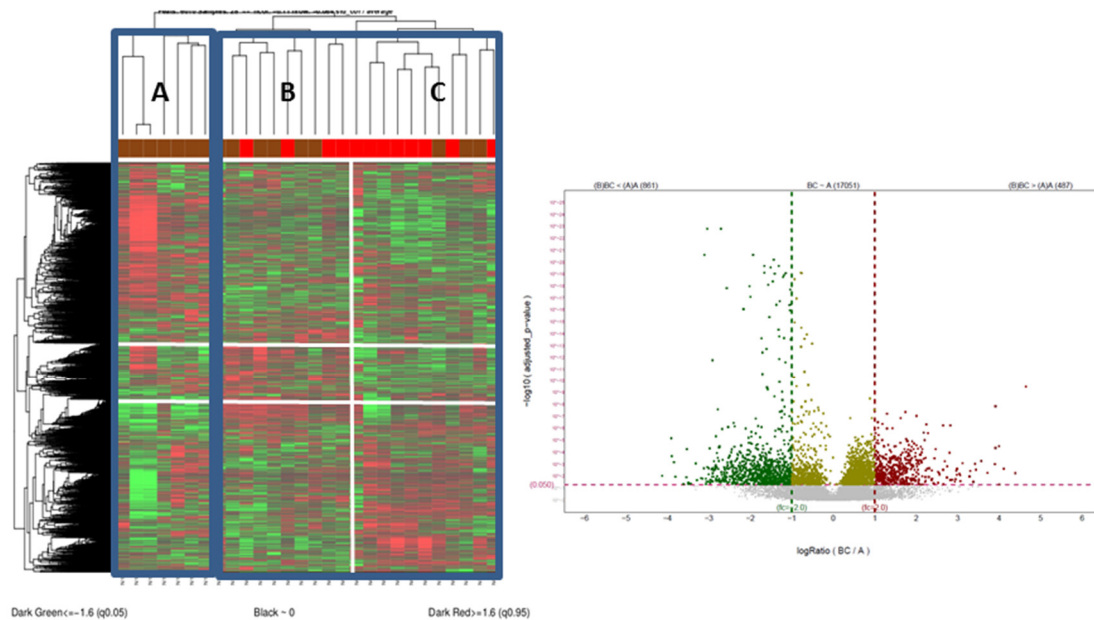

**Figure S5.** Differential gene expression of cluster A and B+C found 1348 genes, Institut Bergonie, 2010–2017.



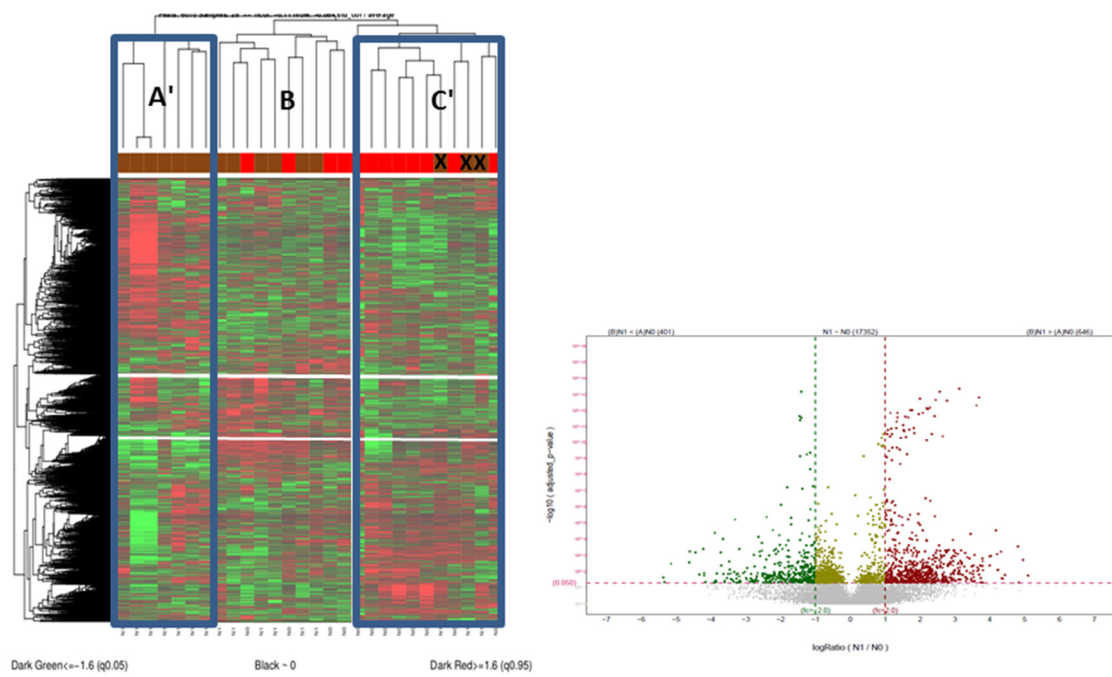

**Figure S6.** Differential gene expression of cluster A and C (N-patients only in C group) found 1047 genes, Institut Bergonie, 2010–2017.
